# Supplementary material
Source: Research Square preprint supplement (doi:10.21203/rs.3.rs-9107549/v1)
Supplement: Supplementary file 1 [file c617c556763f45e238f1e62b.docx]

**Response to Reviewers / Editors Comments**

Dear Editor,

Thank you for your message.

At this stage, no reviewer or editor comments have been received for the present manuscript. Therefore, no point-by-point responses are provided.

I confirm that all submission files have been carefully checked and comply with the journal’s guidelines.

I remain at your disposal for any further clarifications.

**Yours faithfully,**

Prof. Dr. Athanasios S. Dounavis

Corresponding Author

Department of Chemical Engineering,

University of Western Macedonia, GR-50100, Kozani, Greece

Email address: [adounavis@uowm.gr](mailto:adounavis@uowm.gr)
